# Supplementary material
Source: publisher figshare collection journal article supplement (https://sage.figshare.com/ndownloader/files/15374801)
Supplement: Supplementary file 1 [file 15374801]

1  
2  
3  
4  
5  
6  
7  
8  
9  
10  
11  
12  
13  
14  
15  
16  
17  
18  
19  
20  
21  
22  
23  
24  
25  
26  
27  
28  
29  
30  
31  
32  
33  
34  
35  
36  
37  
38  
39  
40  
41  
42  
43  
44  
45  
46  
47  
48  
49  
50  
51  
52  
53  
54  
55  
56  
57  
58  
59  
60

**Supplementary material**

Morin L, Wastesson J, Laroche ML, Fastbom J, Johnell K. How many older adults receive drugs of questionable clinical benefit near the end of life? A cohort study.

- Supplementary Table 1 – List of conditions potentially amenable to palliative care
- Supplementary Table 2 – The RECORD statement – checklist of items, extended from the STROBE statement, that should be reported in observational studies using routinely collected health data.
- Supplementary Table 3 – Drugs of questionable clinical benefit for older adults ( $\geq 75$  years) with an estimated life expectancy of 3 months or less
- Supplementary Table 4 – Identification of chronic diseases between 5 years and 3 months before death from ICD-10 diagnostic codes and drug dispensing data
- Supplementary Table 5 – Estimation of the Hospital Frailty Risk Score from ICD-10 diagnostic codes
- Supplementary Table 6 – Identification of deaths related to acute and potentially unpredictable fatal events
- Supplementary Table 7 – Sensitivity analysis: continuation and initiation of drugs of questionable clinical benefit during the last 3 months of life of older adults who did not die from an acute and potentially unpredictable fatal event, compared with those who did.
- Supplementary Figure 1 – Subgroup analysis: continuation and initiation of drugs of questionable clinical benefit during the last 3 months of life by illness trajectory and age at death
- Supplementary Table 8 – Subgroup analysis: continuation and initiation of drugs of questionable clinical benefit during the last 3 months of life by living arrangement
- Supplementary Table 9 – Detailed list of drugs of questionable clinical benefit continued during the last 3 months of life
- Supplementary Table 10 – Detailed list of drugs of questionable clinical benefit initiated during the last 3 months of life

**Supplementary Table 1 – List of conditions potentially amenable to palliative care and categorization into illness trajectories**

| Illness trajectory, conditions                                                                   | ICD-10 codes                                                                                                                                                    |
|--------------------------------------------------------------------------------------------------|-----------------------------------------------------------------------------------------------------------------------------------------------------------------|
| <b>Cancer (trajectory of short decline with an evident terminal phase)</b>                       |                                                                                                                                                                 |
| Neoplasms and haematological malignancies                                                        | C00-C26, C30-C34, C37-C41, C43-C58, C60-C85, C88, C90-C97, D00-D09, D32, D33, D37-D48                                                                           |
| <b>Organ failure (trajectory of long-term limitations with intermittent acute episodes)</b>      |                                                                                                                                                                 |
| Diabetes                                                                                         | E10-E14, G590, G632, H360, M142, N083                                                                                                                           |
| Other endocrinal diseases                                                                        | E70-E72, E75-E77, E84-E85                                                                                                                                       |
| Infectious and parasitic diseases                                                                | A520-A523, A527, A810, A812, B15-B19, B20-B24                                                                                                                   |
| Diseases of the blood                                                                            | D60, D61, D69, D70, D752, D758, D86                                                                                                                             |
| Diseases of the cardiovascular system (incl. cerebrovascular diseases)                           | I231-I233, I238, I25, I50, I60-I64, I67, I688, I69, G46, I65, I66, I680-I682, I27, I42, I43, I51, I520, I70, I73, I74, I792, I970, I971, I978, I980, I981, I988 |
| Diseases of the respiratory system (incl. abnormalities of breathing)                            | J40-J44, J47, J60-J62, J66, J701, J80, J841, J951-J953, J96, J980-J984, R060, R062-R065, R068                                                                   |
| Diseases of the digestive system (incl. liver diseases)                                          | K70-K77, K44, K50, K51, K55, K56, K85, K86, K871, K90                                                                                                           |
| Diseases of the skin                                                                             | L305, L40-L42, L44, L93, L945                                                                                                                                   |
| Diseases of the musculoskeletal system                                                           | M360, M361, M05, M06, M13, M15, M21, M30-M35, M40-M43, M45-M51, M53, M54, M638, M80, M81, M820, M821, M843, M844, M86-M88, M907, M961                           |
| Diseases of the genitourinary system (incl. renal failure)                                       | N02-N05, N11, N12, N136, N160, N18, N19, N25, N312, N318, N319, N82                                                                                             |
| Other (incl. congenital conditions)                                                              | Q01-Q06, Q078, Q079, Q20-Q28, Q31, Q33, Q40-Q45, Q60-Q68, Q714, Q75-Q79, Q850, Q86-87, Q89-Q93, Q95-Q97, Q99                                                    |
| <b>Prolonged dwindling (trajectory of progressive loss of physical and cognitive capacities)</b> |                                                                                                                                                                 |
| Alzheimer's disease                                                                              | G30-G32                                                                                                                                                         |
| Mental and behavioural disorders                                                                 | F00, F01, F02, F03, F05, F06, R54                                                                                                                               |
| Parkinson's disease                                                                              | G20-G23                                                                                                                                                         |
| Multiple sclerosis                                                                               | G35-G37                                                                                                                                                         |
| Other diseases of the nervous system                                                             | G10, G12, G70-G73, G03-G05, G07, G478, G518, G551, G608, G80-G83, G90-G99                                                                                       |

Abbreviations: ICD-10, International Classification of Diseases 10th revision

Reference: Morin L, Aubry R, Frova L, et al. Estimating the need for palliative care at the population level: A cross-national study in 12 countries. *Palliat Med.* 2017;31(6):526–36.

**Supplementary Table 2 – The RECORD statement – checklist of items, extended from the STROBE statement, that should be reported in observational studies using routinely collected health data.**

| Item no                          | Recommendation                                                                                                                                                                                                                     | Page or section             |
|----------------------------------|------------------------------------------------------------------------------------------------------------------------------------------------------------------------------------------------------------------------------------|-----------------------------|
| Title and abstract               | 1 The type of data used should be specified in the title or abstract. When possible, the name of the databases used should be included.                                                                                            | Page 2, abstract            |
|                                  | If applicable, the geographic region and timeframe within which the study took place should be reported in the title or abstract.                                                                                                  | Page 2, abstract            |
|                                  | If linkage between databases was conducted for the study, this should be clearly stated in the title or abstract.                                                                                                                  | Page 2, abstract            |
| <b>Introduction</b>              |                                                                                                                                                                                                                                    |                             |
| Background/rationale             | 2 Explain the scientific background and rationale for the investigation being reported                                                                                                                                             | Page 4                      |
| Objectives                       | 3 State specific objectives, including any prespecified hypotheses                                                                                                                                                                 | Page 5                      |
| <b>Methods</b>                   |                                                                                                                                                                                                                                    |                             |
| Study design                     | 4 Present key elements of study design early in the paper                                                                                                                                                                          | Page 6, §1                  |
| Setting                          | 5 Describe the setting, locations, and relevant dates, including periods of recruitment, exposure, follow-up, and data collection                                                                                                  | Page 6, §1                  |
| Participants                     | 6 (1) The methods of study population selection (such as codes or algorithms used to identify subjects) should be listed in detail. If this is not possible, an explanation should be provided.                                    | Page 6, §1, eTable1         |
|                                  | (2) Any validation studies of the codes or algorithms used to select the population should be referenced. If validation was conducted for this study and not published elsewhere, detailed methods and results should be provided. | Page 6, §1 eTable1          |
|                                  | (3) If the study involved linkage of databases, consider use of a flow diagram or other graphical display to demonstrate the data linkage process, including the number of individuals with linked data at each stage.             | Figure 2                    |
| Variables                        | 7 A complete list of codes and algorithms used to classify exposures, outcomes, confounders, and effect modifiers should be provided. If these cannot be reported, an explanation should be provided.                              | eTables 3, 4, 5<br>Figure 1 |
| Data sources/ measurement        | 8* For each variable of interest, give sources of data and details of methods of assessment (measurement). Describe comparability of assessment methods if there is more than one group                                            | Page 6, §3                  |
| Bias                             | 9 Describe any efforts to address potential sources of bias                                                                                                                                                                        | Page 7, §2                  |
| Study size                       | 10 Explain how the study size was arrived at                                                                                                                                                                                       | N.A.                        |
| Quantitative variables           | 11 Explain how quantitative variables were handled in the analyses. If applicable, describe which groupings were chosen and why                                                                                                    | Pages 6–7                   |
| Statistical methods              | 12 (a) Describe all statistical methods, including those used to control for confounding                                                                                                                                           | Page 7, §2                  |
|                                  | (b) Describe any methods used to examine subgroups and interactions                                                                                                                                                                | Page 7, §2                  |
|                                  | (c) Explain how missing data were addressed                                                                                                                                                                                        | Page 7, §2                  |
|                                  | (d) If applicable, explain how loss to follow-up was addressed                                                                                                                                                                     | N.A.                        |
|                                  | (e) Describe any sensitivity analyses                                                                                                                                                                                              | Page 7, §2                  |
| Data access and cleaning methods | Authors should describe the extent to which the investigators had access to the database population used to create the study population.                                                                                           | Page 14, §1                 |

| Item no                                                   | Recommendation                                                                                                                                                                                                                                                                                                                                                                                                   | Page or section                                    |
|-----------------------------------------------------------|------------------------------------------------------------------------------------------------------------------------------------------------------------------------------------------------------------------------------------------------------------------------------------------------------------------------------------------------------------------------------------------------------------------|----------------------------------------------------|
|                                                           | Authors should provide information on the data cleaning methods used in the study.                                                                                                                                                                                                                                                                                                                               | Page 6, §1                                         |
|                                                           | State whether the study included person-level, institutional-level, or other data linkage across two or more databases. The methods of linkage and methods of linkage quality evaluation should be provided.                                                                                                                                                                                                     | Page 6, §1                                         |
| <b>Results</b>                                            |                                                                                                                                                                                                                                                                                                                                                                                                                  |                                                    |
| Participants                                              | 13* (a) Describe in detail the selection of the persons included in the study (i.e., study population selection) including filtering based on data quality, data availability and linkage. The selection of included persons can be described in the text and/or by means of the study flow diagram.<br>(b) Give reasons for non-participation at each stage<br>(c) Consider use of a flow diagram               | Page 8, §1<br>Figure 2<br>Page 8, §1<br>Figure 2   |
| Descriptive data                                          | 14* (a) Give characteristics of study participants (eg demographic, clinical, social) and information on exposures and potential confounders<br>(b) Indicate number of participants with missing data for each variable of interest<br>(c) Summarise follow-up time (eg, average and total amount)                                                                                                               | Table 1<br>Page 7, Table 1<br>N.A.                 |
| Outcome data                                              | 15* Report numbers of outcome events or summary measures over time                                                                                                                                                                                                                                                                                                                                               | Table 2                                            |
| Main results                                              | 16 (a) Give unadjusted estimates and, if applicable, confounder-adjusted estimates and their precision (eg, 95% confidence interval). Make clear which confounders were adjusted for and why they were included<br>(b) Report category boundaries when continuous variables were categorized<br>(c) If relevant, consider translating estimates of relative risk into absolute risk for a meaningful time period | Page 8, §2-3<br>N.A.<br>N.A.                       |
| Other analyses                                            | 17 Report other analyses done—eg analyses of subgroups and interactions, and sensitivity analyses                                                                                                                                                                                                                                                                                                                | Page 8, §2-3<br>Supplementary<br>Figure 1, eTable8 |
| <b>Discussion</b>                                         |                                                                                                                                                                                                                                                                                                                                                                                                                  |                                                    |
| Key results                                               | 18 Summarise key results with reference to study objectives                                                                                                                                                                                                                                                                                                                                                      | Page 10, §1                                        |
| Limitations                                               | 19 Discuss the implications of using data that were not created or collected to answer the specific research question(s). Include discussion of misclassification bias, unmeasured confounding, missing data, and changing eligibility over time, as they pertain to the study being reported.                                                                                                                   | Page 12§2<br>Page 13, lines 1-9                    |
| Interpretation                                            | 20 Give a cautious overall interpretation of results considering objectives, limitations, multiplicity of analyses, results from similar studies, and other relevant evidence                                                                                                                                                                                                                                    | Pages 10-11                                        |
| Generalisability                                          | 21 Discuss the generalisability (external validity) of the study results                                                                                                                                                                                                                                                                                                                                         | Page 12, §2                                        |
| <b>Other information</b>                                  |                                                                                                                                                                                                                                                                                                                                                                                                                  |                                                    |
| Funding                                                   | 22 Give the source of funding and the role of the funders for the present study and, if applicable, for the original study on which the present article is based                                                                                                                                                                                                                                                 | Page 14, §2                                        |
| Accessibility of protocol, raw data, and programming code | Authors should provide information on how to access any supplemental information such as the study protocol, raw data, or programming code.                                                                                                                                                                                                                                                                      | Page 14, §6                                        |

*\*Reference: Benchimol EI, Smeeth L, Guttman A, Harron K, Moher D, Petersen I, Sørensen HT, von Elm E, Langan SM, the RECORD Working Committee. The Reporting of studies Conducted using Observational Routinely-collected health Data (RECORD) Statement. PLoS Medicine 2015.*

For Peer Review

### Supplementary Table 3 – Drugs of questionable clinical benefit for older adults ( $\geq 75$ years) with an estimated life expectancy of 3 months or less

The following criteria were developed through a Delphi consensus method. Source: Morin L, Laroche M-L, Vetrano DL, Fastbom J, Johnell K. Adequate, questionable, and inadequate drug prescribing for older adults at the end of life: a European expert consensus. *Eur J Clin Pharmacol*; 2018;74(10):1333–42.

#### Continuation of questionable clinical benefit (ATC code)

Vitamin D (A11CC)  
 Calcium supplement (A12A)  
 Cardiac stimulants other than glycosides (C01C)  
 Antihypertensives, *excluding*  $\alpha$ -blockers (C02)  
 Peripheral vasodilators (C04)  
 Lipid-modifying agents (C10)  
 Immunostimulants (L03A)  
 Drugs for osteoporosis (M05B)  
 Antidementia drugs (N06D)

#### Initiation of questionable clinical benefit (ATC code)

Vitamin D (A11CC)  
 Calcium supplement (A12A)  
 Vitamin K antagonists (B01AA)  
 Novel oral anticoagulants (B01AE, B01AF)  
 Other anticoagulants (B01AD, B01AX)  
 Antianemic drugs (B03A, B03B, B03XA01)  
 Cardiac glycosides, *excluding* digoxin (C01A)  
 Other cardiac stimulants (C01C)  
 Antihypertensives (C02)  
 Peripheral vasodilators (C04)  
 Verapamil (C08DA01)  
 Angiotensin-converting-enzyme inhibitors (C09A, C09B)  
 Angiotensin II antagonists (C09C, C09D)  
 Lipid-modifying agents (C10)  
 Drugs for urinary incontinence, *excluding* oxybutynin (G04BD)  
 Finasteride (G04CA51)  
 Antineoplastic drugs (L01)  
 Endocrine therapies (L02)  
 Immunostimulant (L03A)  
 Immunosuppressants (L04A)  
 Drugs for osteoporosis (M05B)  
 Antidementia drugs (N06D)

Abbreviation: ATC, Anatomical Therapeutic Chemical classification

Additional information about each drug class can be found on the website of the WHO Collaborating Center for Drug Statistics Methodology: [https://www.whocc.no/atc\\_ddd\\_index](https://www.whocc.no/atc_ddd_index)

1  
2  
3  
4  
5  
6  
7  
8  
9  
10  
11  
12  
13  
14  
15  
16  
17  
18  
19  
20  
21  
22  
23  
24  
25  
26  
27  
28  
29  
30  
31  
32  
33  
34  
35  
36  
37  
38  
39  
40  
41  
42  
43  
44  
45  
46

**Supplementary Table 4 – Identification of chronic diseases between 5 years and 3 months before death from ICD-10 diagnostic codes and drug dispensing data**

The following algorithm was adapted from Calderón-Larrañaga A, Vetrano DL, Onder G, et al. Assessing and Measuring Chronic Multimorbidity in the Older Population: A Proposal for Its Operationalization. *Journals Gerontol A Biol Sci Med Sci.* 2017;72(10):1417-1423. Compared with the original assessment tool, 9 conditions were excluded from the total number of chronic diseases: allergies, anemia, asthma, chronic ulcer of the skin, colitis, dorsopathies, dyslipidemia, and sleep disorders because near the end of life these conditions can be secondary symptoms of the underlying illness or of the treatments rather than separate entities; and obesity because routinely collected ICD-10 code E66 has been deemed too inaccurate for this condition.

| Chronic disease                        | Clinical diagnoses (ICD-10 codes)                                                                                                                                    | Drug dispensing data (ATC codes and drug indications)                                  |
|----------------------------------------|----------------------------------------------------------------------------------------------------------------------------------------------------------------------|----------------------------------------------------------------------------------------|
| Source(s) of data:                     | (a) Swedish Cause of Death Register<br>(b) Swedish National Patient Register                                                                                         | Swedish Prescribed Drug Register                                                       |
| Atrial fibrillation                    | I48                                                                                                                                                                  | Drug indications in combination with ATC codes C07A, B01A, C01AA05, C01D, C01B or C08D |
| Autoimmune diseases                    | I73.1; L10 (excl. L10.5); L12; L40; L41; L93-L95; M30-M36 (excl. M32.0; M34.2; M35.7-M35.9; M36.0; M36.1; M36.2; M36.3)                                              | Drug indications or ATC code D05                                                       |
| Blindness, visual loss                 | H54 (excl. H54.3); Z44.2; Z97.0                                                                                                                                      |                                                                                        |
| Blood and blood forming organ diseases | D66-D69 (excl. D68.3; D68.4; D69.5); D71; D72.0; D73.0-D73.2; D74 (excl. D74.8); D75.0; D76.1; D76.3; D77; D80 (excl. D80.7); D81-D84; D86; D89 (excl. D89.1; D89.3) | Drug indication                                                                        |
| Bradycardias and conduction diseases   | I44.1-I44.3; I45.3; I45.5; Z95.0                                                                                                                                     | Drug indication in combination with ATC codes C01A, C01B or C07A                       |
| Cardiac valve diseases                 | I05-I08; I09.1; I09.8; I34-I38; I39.0-I39.4; Q22; Q23; Z95.2-Z95.4                                                                                                   | Drug indication                                                                        |
| Cataract and other lens diseases       | H25-H28; Q12; Z96.1                                                                                                                                                  | Drug indication                                                                        |
| Cerebrovascular disease                | G45; G46; I60-I64; I67; I69                                                                                                                                          | Drug indication in combination with ATC codes B01A, C10, or N03AX                      |
| Chromosomal abnormalities              | Q90-Q99                                                                                                                                                              |                                                                                        |
| Chronic infectious diseases            | A15-A19; A30; A31; A50-A53 (excl. A51); A65-A67; A69.2; A81; B20-B24; B38.1; B39.1; B40.1; B57.2-B57.5; B65; B92; B94; J65; M86.3-M86.6                              | J04A, excl. J04AB01, J04AB02, J04AB03 and J04AC                                        |
| Chronic kidney disease                 | I12.0; I13.0-I13.9; N01, N02, N04, N05; N07; N08; N11; N18.3-N18.9; Q60; Q61.1-Q61.9; Z90.5; Z94.0                                                                   | Drug indication in combination with ATC codes A02AH, A11, A12, B03AX, C09 or C03CA     |
| Chronic liver disease                  | B18; K70 (excl. K70.0; K70.1); K71.3-K71.5; K71.7; K72.1; K73; K74; K75.3-K75.8; K76.1; K76.6; K76.7; K77.8; Q44.6; Z94.4                                            | Drug indication or ATC codes A05AA02, A06AD11                                          |



| Chronic disease                                          | Clinical diagnoses (ICD-10 codes)                                                                                                                                              | Drug dispensing data (ATC codes and drug indications)                                                  |
|----------------------------------------------------------|--------------------------------------------------------------------------------------------------------------------------------------------------------------------------------|--------------------------------------------------------------------------------------------------------|
| Chronic pancreas, biliary tract and gallbladder diseases | K80.0; K80.1; K80.2; K80.8; K81.1; K86 (excl. K86.2; K86.3; K86.9); Q44.0-Q44.5; Q45.0                                                                                         | ATC code A09AA02                                                                                       |
| COPD, emphysema, chronic bronchitis                      | J41-J44; J47                                                                                                                                                                   | ATC code R03BB, or drug indication in combination with ATC codes H02AB, J01A, J01C, N02A, R03, or R05. |
| Deafness, hearing loss                                   | H80; H90; H91.1; H91.3; H91.9; Q16; Z45.3; Z46.1; Z96.2; Z97.4                                                                                                                 |                                                                                                        |
| Dementia                                                 | F00-F03; F05.1; G30; G31 [R54 if only cause of death available]                                                                                                                | ATC code N06D, or drug indication                                                                      |
| Depression and mood diseases                             | F30-F34; F38; F39; F41.2                                                                                                                                                       | Drug indication in combination with ATC codes N03A, N05AD, N05AH, N05AN, N05AX, N06A                   |
| Diabetes                                                 | E10; E11; E13; E14; E89.1                                                                                                                                                      | ATC code A10                                                                                           |
| Ear, nose, throat diseases                               | H60.4; H66.1-H66.3; H70.1; H71; H73.1; H74.1; H81.0; H83.1; H83.2; H95; J30.0; J31-J33; J34.1-J34.3; J35; J37; J38.0; J38.6; K05.1; K05.3; K07; K11.0; K11.7; Q30-Q32; Q35-Q38 |                                                                                                        |
| Epilepsy                                                 | G40 (excl. G40.5)                                                                                                                                                              | Drug indication                                                                                        |
| Esophagus, stomach and duodenum diseases                 | I85; I86.4; I98.2; I98.3; K21; K22.0; K22.2; K22.4; K22.5; K22.7; K23.0; K23.1; K25.4-K25.7; K26.4-K26.7; K27.4-K27.7; K28.4-K28.7; K29.3-K29.9; K31.1-K31.5; Q39; Q40; Z90.3  | ATC code A02BX, or drug indication in combination with ATC code A02                                    |
| Glaucoma                                                 | H40.1-H40.9                                                                                                                                                                    | ATC code S01ED or drug indication                                                                      |
| Heart failure                                            | I11.0; I13.0; I13.2; I27; I28.0; I42; I43; I50; I51.5; I51.7; I52.8; Z94.1; Z94.3                                                                                              | Drug indication in combination with ATC codes C01, C03, C07A or C09                                    |
| Hematological neoplasms                                  | C81-C96                                                                                                                                                                        |                                                                                                        |
| Hypertension                                             | I10-I15                                                                                                                                                                        | Drug indication in combination with ATC codes C02, C03, C07, C08, or C09                               |
| Inflammatory arthropathies                               | M02.3; M05-M14; M45; M46.0; M46.1; M46.8; M46.9                                                                                                                                | ATC code M01CB, or drug indication in combination with ATC codes H02AB, L04, M04                       |
| Inflammatory bowel disease                               | K50; K51                                                                                                                                                                       | ATC code A07E, or indication for Crohn's disease                                                       |
| Ischemic heart disease                                   | I20-I22; I24; I25; Z95.1; Z95.5                                                                                                                                                | ATC code C01DA or C01EB18, or drug indication in combination with ATC codes C01 to C10.                |
| Migraine and facial pain syndromes                       | G43; G44.0-G44.3; G44.8; G50                                                                                                                                                   | ATC code N02C or drug indication                                                                       |
| Multiple sclerosis                                       | G35                                                                                                                                                                            | Drug indication                                                                                        |
| Neurotic, stress-related and somatoform diseases         | F40-F48 (excl. F43.0; F43.2)                                                                                                                                                   |                                                                                                        |
| Osteoarthritis and other degenerative joint diseases     | M15-M19; M36.2; M36.3                                                                                                                                                          | Drug indication in combination with ATC code M                                                         |



| Chronic disease                          | Clinical diagnoses (ICD-10 codes)                                                                                                                                                                                                                                                                                                                          | Drug dispensing data (ATC codes and drug indications)                                         |
|------------------------------------------|------------------------------------------------------------------------------------------------------------------------------------------------------------------------------------------------------------------------------------------------------------------------------------------------------------------------------------------------------------|-----------------------------------------------------------------------------------------------|
| Osteoporosis                             | M80-M82                                                                                                                                                                                                                                                                                                                                                    | ATC codes M05BA; M05BB; M05BX03; M05BX53, or drug indication in combination with ATC code M05 |
| Other cardiovascular diseases            | I09 (excl. I09.1; I09.8); I28.1; I31.0; I31.1; I45.6; I49.5; I49.8; I70-I72 (excl. I70.2); I79.0; I79.1; I95.0; I95.1; I95.8; Q20; Q21; Q24-Q28; Z95.8; Z95.9                                                                                                                                                                                              |                                                                                               |
| Other digestive diseases                 | K66.0; K90.0-K90.2; K91.1; K93; Q41-Q43; R15; Z90.4; Z98.0                                                                                                                                                                                                                                                                                                 |                                                                                               |
| Other eye diseases                       | H02.2-H02.5; H04 (excl. H04.3); H05 (excl. H05.0); H10.4; H17; H18.4-H18.9; H19.3; H19.8; H20.1; H21; H31.0-H31.2; H31.8; H31.9; H33; H35.2-H35.5; H35.7-H35.9; H36; H47-H49 (excl. H47.0; H47.1; H48.1); H51; Q10-Q15 (excl. Q12); Z94.7                                                                                                                  |                                                                                               |
| Other genitourinary diseases             | B90.1; N20.0; N20.2; N20.9; N21.0; N21.8; N21.9; N22; N30.1-N30.4; N31; N32.0; N32.3; N32.8; N32.9; N33; N35; N39.3; N39.4; N48.0; N48.4; N48.9; N70.1; N71.1; N73.1; N73.4; N73.6; N76.1; N76.3; N81; N88; N89.5; N90.5; N95.2; Q54; Q62.0-Q62.4; Q62.7; Q62.8; Q63.8; Q63.9; Q64.0; Q64.1; Q64.3-Q64.9; Z90.6; Z90.7; Z96.0                              | Drug indication                                                                               |
| Other metabolic diseases                 | E20-E31 (excl. E23.1; E24.2; E24.4; E27.3; E30); E34 (excl. E34.3; E34.4); E35 (excl. E35.0); E40-E46 (excl. E44.1); E64; E70-E72; E74-E77; E79 (excl. E79.0); E80 (excl. E80.4); E83-E89 (excl. E86; E87; E88.3; E89.0; E89.1); K90.3; K90.4; K90.8; K90.9; K91.2; M83; M88; N25                                                                          |                                                                                               |
| Other musculoskeletal and joint diseases | B90.2; M21.2-M21.9; M22-M24; M25.2; M25.3; M35.7; M61; M65.2-M65.4; M70.0; M72.0; M72.2; M72.4; M75.0; M75.1; M75.3; M75.4; M79.7; M84.1; M89; M91; M93; M94; M96; M99; S38.2; S48; S58; S68; S78; S88; S98; T05; T09.6; T11.6; T13.6; T14.7; T90-T98; Q65; Q66; Q68; Q71-Q74; Q77; Q78; Q79.6; Q79.8; Q87; Z44.0; Z44.1; Z89.1-Z89.9; Z94.6; Z96.6; Z97.1 | Drug indication                                                                               |
| Other neurological diseases              | B90.0; D48.2; G04.1; G09-G14 (excl. G13.0; G13.1); G24-G26 (excl. G25.1; G25.4; G25.6); G32; G37; G51-G53 (excl. G51.0); G70; G71; G72.3-72.9; G73 (excl. G73.2-G73.4); G80-G83 (excl. G83.8); G90; G91; G93.8; G93.9; G95; G99; M47.1; Q00-Q07; Q76.0                                                                                                     |                                                                                               |

| Chronic disease                           | Clinical diagnoses (ICD-10 codes)                                                                                                                                                                                                                                               | Drug dispensing data (ATC codes and drug indications)                      |
|-------------------------------------------|---------------------------------------------------------------------------------------------------------------------------------------------------------------------------------------------------------------------------------------------------------------------------------|----------------------------------------------------------------------------|
| Other psychiatric and behavioral diseases | F04; F06; F07; F09; F10.2; F10.6; F10.7; F11.2; F11.6; F11.7; F12.2; F12.6; F12.7; F13.2; F13.6; F13.7; F14.2; F14.6; F14.7; F15.2; F15.6; F15.7; F16.2; F16.6; F16.7; F17.2; F17.6; F17.7; F18.2; F18.6; F18.7; F19.2; F19.6; F19.7; F50; F52; F60-F63; F68; F70-F89; F95; F99 | ATC code N07BB or indication for alcohol-related dependence                |
| Other respiratory diseases                | B90.9; E66.2; J60-J67; J68.4; J70.1; J70.3; J70.4; J84; J92; J94.1; J95.3; J95.5; J96.1; J98 (excl. J98.1); Q33; Q34; Z90.2; Z94.2; Z94.3; Z96.3                                                                                                                                |                                                                            |
| Other skin diseases                       | L13; L28; L30.1; L43 (excl. L43.2); L50.8; L58.1; L85; Q80; Q81; Q82.1; Q82.2; Q82.9                                                                                                                                                                                            |                                                                            |
| Parkinson and parkinsonism                | G20-G23 (excl. G21.0)                                                                                                                                                                                                                                                           | ATC codes N04BA; N04BC; N04BX, or drug indication                          |
| Peripheral neuropathy                     | B91; G54-G60; G62.8; G62.9; G63 (excl. G63.1); M47.2; M53.1; M54.1                                                                                                                                                                                                              | Drug indication                                                            |
| Peripheral vascular disease               | I70.2; I73 (excl. I73.1; I73.8); I79.2; I79.8                                                                                                                                                                                                                                   | ATC code B01AC23                                                           |
| Prostate diseases                         | N40; N41.1; N41.8                                                                                                                                                                                                                                                               | ATC code G04C (excl. G04CB), or drug indication                            |
| Schizophrenia and delusional diseases     | F20; F22; F24; F25; F28                                                                                                                                                                                                                                                         | Drug indication in combination with ATC code N05                           |
| Solid neoplasms                           | All C (excl. C81-C96); D00-D09; D32.0; D32.1; D32.9; D33.0-D33.4; Q85                                                                                                                                                                                                           | ATC code L01X, or drug indication                                          |
| Thyroid disease                           | E00-E03 (excl. E03.5); E05; E06.2; E06.3; E06.5; E07; E35.0; E89.0                                                                                                                                                                                                              | ATC codes H03AA; H03B; or drug indication in combination with ATC code H03 |
| Venous and lymphatic diseases             | I78.0; I83; I87; I89; I97.2; Q82.0                                                                                                                                                                                                                                              |                                                                            |

Abbreviations: ICD-10: International Classification of Diseases, 10th revision; ATC: Anatomical Therapeutic Chemical classification system

#### More information about the Swedish cause of death register, the Swedish national patient register and the Swedish Prescribed Drug Register:

- Brooke HL, Talbäck M, Hörnblad J, et al. The Swedish Cause of Death Register. *Eur J Epidemiol.* 2017;32(9):765-773.
- Ludvigsson JF, Andersson E, Ekbom A, et al. External review and validation of the Swedish national inpatient register. *BMC Public Health.* 2011;11(1):450.
- Wettermark B, Hammar N, Fored CM, et al. The new Swedish Prescribed Drug Register. Opportunities for pharmacoepidemiological research and experience from the first six months. *Pharmacoepidemiol Drug Saf.* 2007;16(7):726-735.

Supplementary Table 5 – Estimation of the Hospital Frailty Risk Score from ICD-10 diagnostic codes

The Hospital Frailty Risk Score was initially developed and validated for older adults in acute care settings. For the present study, it was computed based on ICD-10 codes reported in all inpatient and specialized outpatient care discharge reports from 5 years to 3 months before death. Source: Gilbert T, Neuburger J, Kraindler J, et al. Development and validation of a Hospital Frailty Risk Score focusing on older people in acute care settings using electronic hospital records: an observational study. *Lancet*. 2018;391(10132):1775-1782.

| #  | ICD-10 code | Description                                                            | Weight |
|----|-------------|------------------------------------------------------------------------|--------|
| 1  | F00         | Dementia in Alzheimer's disease                                        | 7.1    |
| 2  | G81         | Hemiplegia                                                             | 4.4    |
| 3  | G30         | Alzheimer's disease                                                    | 4      |
| 4  | I69         | Sequelae of cerebrovascular disease (secondary codes)                  | 3.7    |
| 5  | R29         | Other symptoms and signs of the nervous and musculoskeletal systems    | 3.6    |
| 6  | N39         | Other disorders of urinary system (e.g. urinary tract infection)       | 3.2    |
| 7  | F05         | Delirium, not induced by alcohol and other psychoactive substances     | 3.2    |
| 8  | W19         | Unspecified fall                                                       | 3.2    |
| 9  | S00         | Superficial injury of head                                             | 3.2    |
| 10 | R31         | Unspecified haematuria                                                 | 3      |
| 11 | B96         | Other bacterial agents as the cause of diseases                        | 2.9    |
| 12 | R41         | Other symptoms and signs involving cognitive functions and awareness   | 2.7    |
| 13 | R26         | Abnormalities of gait and mobility                                     | 2.6    |
| 14 | I67         | Other cerebrovascular diseases                                         | 2.6    |
| 15 | R56         | Convulsions, not elsewhere classified                                  | 2.6    |
| 16 | R40         | Somnolence, stupor and coma                                            | 2.5    |
| 17 | T83         | Complications of genitourinary prosthetic devices, implants and grafts | 2.4    |
| 18 | S06         | Intracranial injury                                                    | 2.4    |
| 19 | S42         | Fracture of shoulder and upper arm                                     | 2.3    |
| 20 | E87         | Other disorders of fluid, electrolyte and acid-base balance            | 2.3    |
| 21 | M25         | Other joint disorders, not elsewhere classified                        | 2.3    |
| 22 | E86         | Volume depletion                                                       | 2.3    |
| 23 | R54         | Senility                                                               | 2.2    |
| 24 | Z50         | Care involving use of rehabilitation procedures                        | 2.1    |
| 25 | F03         | Unspecified dementia                                                   | 2.1    |
| 26 | W18         | Other fall on same level                                               | 2.1    |
| 27 | Z75         | Problems related to medical facilities and other health care           | 2      |
| 28 | F01         | Vascular dementia                                                      | 2      |
| 29 | S80         | Superficial injury of lower leg                                        | 2      |
| 30 | L03         | Cellulitis                                                             | 2      |
| 31 | H54         | Blindness and low vision                                               | 1.9    |
| 32 | E53         | Deficiency of other B group vitamins                                   | 1.9    |
| 33 | Z60         | Problems related to social environment                                 | 1.8    |
| 34 | G20         | Parkinson's disease                                                    | 1.8    |
| 35 | R55         | Syncope and collapse                                                   | 1.8    |
| 36 | S22         | Fracture of rib(s), sternum and thoracic spine                         | 1.8    |
| 37 | K59         | Other functional intestinal disorders                                  | 1.8    |
| 38 | N17         | Acute renal failure                                                    | 1.8    |
| 39 | L89         | Decubitus ulcer                                                        | 1.7    |

Supplementary Table 5 – Continued

| #  | ICD-10 code | Description                                                             | Weight |
|----|-------------|-------------------------------------------------------------------------|--------|
| 40 | Z22         | Carrier of infectious disease                                           | 1.7    |
| 41 | B95         | Streptococcus and staphylococcus                                        | 1.7    |
| 42 | L97         | Ulcer of lower limb, not elsewhere classified                           | 1.6    |
| 43 | R44         | Other symptoms and signs involving general sensations and perceptions   | 1.6    |
| 44 | K26         | Duodenal ulcer                                                          | 1.6    |
| 45 | I95         | Hypotension                                                             | 1.6    |
| 46 | N19         | Unspecified renal failure                                               | 1.6    |
| 47 | A41         | Other septicaemia                                                       | 1.6    |
| 48 | Z87         | Personal history of other diseases and conditions                       | 1.5    |
| 49 | J96         | Respiratory failure, not elsewhere classified                           | 1.5    |
| 50 | X59         | Exposure to unspecified factor                                          | 1.5    |
| 51 | M19         | Other arthrosis                                                         | 1.5    |
| 52 | G40         | Epilepsy                                                                | 1.5    |
| 53 | M81         | Osteoporosis without pathological fracture                              | 1.4    |
| 54 | S72         | Fracture of femur                                                       | 1.4    |
| 55 | S32         | Fracture of lumbar spine and pelvis                                     | 1.4    |
| 56 | E16         | Other disorders of pancreatic internal secretion                        | 1.4    |
| 57 | R94         | Abnormal results of function studies                                    | 1.4    |
| 58 | N18         | Chronic renal failure                                                   | 1.4    |
| 59 | R33         | Retention of urine                                                      | 1.3    |
| 60 | R69         | Unknown and unspecified causes of morbidity                             | 1.3    |
| 61 | N28         | Other disorders of kidney and ureter, not elsewhere classified          | 1.3    |
| 62 | R32         | Unspecified urinary incontinence                                        | 1.2    |
| 63 | G31         | Other degenerative diseases of nervous system, not elsewhere classified | 1.2    |
| 64 | Y95         | Nosocomial condition                                                    | 1.2    |
| 65 | S09         | Other and unspecified injuries of head                                  | 1.2    |
| 66 | R45         | Symptoms and signs involving emotional state                            | 1.2    |
| 67 | G45         | Transient cerebral ischaemic attacks and related syndromes              | 1.2    |
| 68 | Z74         | Problems related to care-provider dependency                            | 1.1    |
| 69 | M79         | Other soft tissue disorders, not elsewhere classified                   | 1.1    |
| 70 | W06         | Fall involving bed                                                      | 1.1    |
| 71 | S01         | Open wound of head                                                      | 1.1    |
| 72 | A04         | Other bacterial intestinal infections                                   | 1.1    |
| 73 | A09         | Diarrhoea and gastroenteritis of presumed infectious origin             | 1.1    |
| 74 | J18         | Pneumonia, organism unspecified                                         | 1.1    |
| 75 | J69         | Pneumonitis due to solids and liquids                                   | 1      |
| 76 | R47         | Speech disturbances, not elsewhere classified                           | 1      |
| 77 | E55         | Vitamin D deficiency                                                    | 1      |
| 78 | Z93         | Artificial opening status                                               | 1      |
| 79 | R02         | Gangrene, not elsewhere classified                                      | 1      |
| 80 | R63         | Symptoms and signs concerning food and fluid intake                     | 0.9    |
| 81 | H91         | Other hearing loss                                                      | 0.9    |
| 82 | W10         | Fall on and from stairs and steps                                       | 0.9    |
| 83 | W01         | Fall on same level from slipping, tripping and stumbling                | 0.9    |
| 84 | E05         | Thyrotoxicosis [hyperthyroidism]                                        | 0.9    |

Supplementary Table 5 – Continued

| #   | ICD-10 code | Description                                                | Weight |
|-----|-------------|------------------------------------------------------------|--------|
| 85  | M41         | Scoliosis                                                  | 0.9    |
| 86  | R13         | Dysphagia                                                  | 0.8    |
| 87  | Z99         | Dependence on enabling machines and devices                | 0.8    |
| 88  | U80         | Agent resistant to penicillin and related antibiotics      | 0.8    |
| 89  | M80         | Osteoporosis with pathological fracture                    | 0.8    |
| 90  | K92         | Other diseases of digestive system                         | 0.8    |
| 91  | I63         | Cerebral Infarction                                        | 0.8    |
| 92  | N20         | Calculus of kidney and ureter                              | 0.7    |
| 93  | F10         | Mental and behavioural disorders due to use of alcohol     | 0.7    |
| 94  | Y84         | Other medical procedures as the cause of abnormal reaction | 0.7    |
| 95  | R00         | Abnormalities of heart beat                                | 0.7    |
| 96  | J22         | Unspecified acute lower respiratory infection              | 0.7    |
| 97  | Z73         | Problems related to life-management difficulty             | 0.6    |
| 98  | R79         | Other abnormal findings of blood chemistry                 | 0.6    |
| 99  | Z91         | Personal history of risk-factors, not elsewhere classified | 0.5    |
| 100 | S51         | Open wound of forearm                                      | 0.5    |
| 101 | F32         | Depressive episode                                         | 0.5    |
| 102 | M48         | Spinal stenosis (secondary code only)                      | 0.5    |
| 103 | E83         | Disorders of mineral metabolism                            | 0.4    |
| 104 | M15         | Polyarthrosis                                              | 0.4    |
| 105 | D64         | Other anaemias                                             | 0.4    |
| 106 | L08         | Other local infections of skin and subcutaneous tissue     | 0.4    |
| 107 | R11         | Nausea and vomiting                                        | 0.3    |
| 108 | K52         | Other noninfective gastroenteritis and colitis             | 0.3    |
| 109 | R50         | Fever of unknown origin                                    | 0.1    |

Abbreviations: ICD-10: International Classification of Diseases, 10th revision.

**Supplementary Table 6 – Identification of deaths related to acute and potentially unpredictable fatal events**

| ICD Chapter                                                                             | Main criteria                                                                                                                       | Conditional argument                                                          |
|-----------------------------------------------------------------------------------------|-------------------------------------------------------------------------------------------------------------------------------------|-------------------------------------------------------------------------------|
|                                                                                         | <i>ICD-10 codes listed as underlying cause of death</i>                                                                             | <i>Inpatient or specialized outpatient care admission in the past 5 years</i> |
| Certain infectious and parasitic diseases                                               | A00; A01; A02; A03; A04; A05; A06; A07; A08; A09; A39; A40; A41; A499; A80; A81; A87; B371; B375; B377; B440; B441; B448; B449; B99 |                                                                               |
| Diseases of the blood and blood-forming organs                                          | D611; D619; D649                                                                                                                    |                                                                               |
| Endocrine, nutritional and metabolic diseases                                           | E86                                                                                                                                 |                                                                               |
| Diseases of the nervous system                                                          | G000; G001; G002; G003; G009; G039; G040; G048; G049; G060; G062; G931; G936                                                        |                                                                               |
| Ischaemic and pulmonary heart diseases                                                  | I20; I21; I23; I25; I249; I249; I255; I26; I28                                                                                      | No history of ischemic heart disease (I20-I25) or pulmonary embolism (I26)    |
| Other forms of heart disease                                                            | I30; I33; I40; I461; I469                                                                                                           |                                                                               |
| Cerebrovascular diseases                                                                | I60; I61; I62; I63; I64; I65; I66; I67                                                                                              | No history of cerebrovascular disease (I60-I69)                               |
| Diseases of arteries, arterioles and capillaries                                        | I71; I72; I74; I97                                                                                                                  |                                                                               |
| Diseases of the respiratory system                                                      | J069; J09; J10; J11; J12; J13; J14; J15; J18; J22; J690; J81; J851; J852; J93; J958; J960                                           |                                                                               |
| Diseases of the digestive system                                                        | K250; K251; K252; K253; K254; K255; K256; K257; K259; K260; K261; K263; K264; K265; K266; K269; K550; K65; K720; K810; K859         |                                                                               |
| Diseases of the musculoskeletal system and connective tissue                            | M726                                                                                                                                |                                                                               |
| Diseases of the genitourinary system                                                    | N00; N04; N10; N17; N390; N990; N998                                                                                                | No history of diabetes (E10-14) or renal failure (N18-19)                     |
| Symptoms, signs and abnormal clinical and laboratory findings, not elsewhere classified | R02; R572; R570; R571                                                                                                               |                                                                               |
| Injury, poisoning and certain other consequences of external causes                     | S065; S066; S068; S069; S071; S10-99; T00-T99                                                                                       |                                                                               |
| External causes of morbidity and mortality                                              | V00-V99; X60-79; X80-84                                                                                                             |                                                                               |

**Supplementary Table 7 – Sensitivity analysis: continuation and initiation of drugs of questionable clinical benefit during the last 3 months of life of older adults who did not die from an acute and potentially unpredictable fatal event, compared with those who did**

| <b>Died from acute and potentially unpredictable fatal event</b> | <b>Continuation</b> |                 | <b>Initiation</b> |                 |
|------------------------------------------------------------------|---------------------|-----------------|-------------------|-----------------|
|                                                                  | No<br>(n=48 497)    | Yes<br>(n=9918) | No<br>(n=48 497)  | Yes<br>(n=9918) |
| <b>Overall proportion</b>                                        | 31.8                | 32.7            | 13.7              | 15.4            |
| <b>Sex</b>                                                       |                     |                 |                   |                 |
| Men                                                              | 31.8                | 31.6            | 14.7              | 15.3            |
| Women                                                            | 31.8                | 33.6            | 13.0              | 15.5            |
| <b>Age at time of death</b>                                      |                     |                 |                   |                 |
| 75–84 years                                                      | 36.5                | 39.6            | 15.3              | 17.3            |
| 85–94 years                                                      | 31.1                | 32.1            | 13.3              | 15.2            |
| 95 year and older                                                | 17.6                | 15.2            | 9.9               | 10.7            |
| <b>Illness trajectory</b>                                        |                     |                 |                   |                 |
| Cancer                                                           | 25.6                | 31.0            | 14.9              | 17.4            |
| Organ failure                                                    | 35.9                | 32.6            | 16.9              | 16.5            |
| Prolonged dwindling                                              | 33.7                | 33.5            | 9.4               | 11.9            |
| <b>Number of chronic diseases</b>                                |                     |                 |                   |                 |
| 0-1                                                              | 10.3                | 12.0            | 9.3               | 12.8            |
| 2-3                                                              | 20.4                | 19.8            | 10.5              | 12.4            |
| 4-5                                                              | 27.2                | 30.2            | 12.4              | 14.1            |
| ≥6                                                               | 37.2                | 38.2            | 15.1              | 16.9            |
| <b>Hospital Frailty Risk Score</b>                               |                     |                 |                   |                 |
| Low risk (<5)                                                    | 26.5                | 28.7            | 14.8              | 16.3            |
| Intermediate risk (5-15)                                         | 33.6                | 36.1            | 13.4              | 14.7            |
| High risk (>15)                                                  | 43.1                | 43.5            | 11.1              | 12.7            |
| <b>Living arrangement</b>                                        |                     |                 |                   |                 |
| Community-dwelling                                               | 31.0                | 32.9            | 17.5              | 18.6            |
| Nursing home                                                     | 33.0                | 32.5            | 8.6               | 10.1            |
| <b>Marital status</b>                                            |                     |                 |                   |                 |
| Married                                                          | 34                  | 35.6            | 15.5              | 16.7            |
| Single or divorced                                               | 32.1                | 31.4            | 13.3              | 14.8            |
| Widowed                                                          | 30.4                | 31.7            | 12.8              | 14.9            |
| <b>Level of education</b>                                        |                     |                 |                   |                 |
| Primary education                                                | 31.5                | 31.2            | 13.6              | 15.3            |
| Secondary education                                              | 32.7                | 34.9            | 13.9              | 15.3            |
| Tertiary education                                               | 31.6                | 33.7            | 13.5              | 16.3            |

Missing values: level of education, 1302 (2.2%)



**Supplementary Figure 1 – Subgroup analysis: continuation and initiation of drugs of questionable clinical benefit during the last 3 months of life, by illness trajectory and age at death**

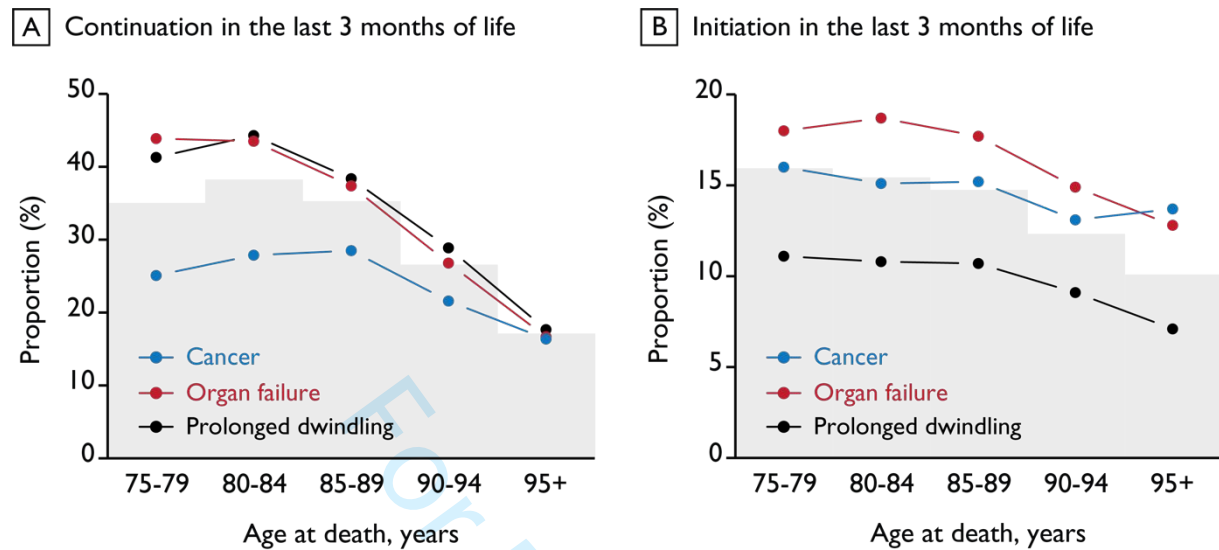

*Legend Supplementary Figure 1: Shaded areas represent the overall age-specific proportion of older adults who continued and initiated at least one drug of questionable clinical benefit during the last 3 months before death.*

**Supplementary Table 8 – Subgroup analysis: continuation and initiation of drugs of questionable clinical benefit during the last 3 months of life, by living arrangement**

| Living arrangement          | Continuation            |                            | Initiation              |                            |
|-----------------------------|-------------------------|----------------------------|-------------------------|----------------------------|
|                             | Community<br>(n=33 862) | Nursing home<br>(n=24 553) | Community<br>(n=33 862) | Nursing home<br>(n=24 553) |
| Overall proportion          | 31.3                    | 32.9                       | 17.7                    | 8.8                        |
| Sex                         |                         |                            |                         |                            |
| Men                         | 31.0                    | 33.3                       | 17.5                    | 9.2                        |
| Women                       | 31.6                    | 32.7                       | 18.0                    | 8.6                        |
| Age at time of death        |                         |                            |                         |                            |
| 75–84 years                 | 34.8                    | 42.6                       | 18.1                    | 9.1                        |
| 85–94 years                 | 29.7                    | 33.0                       | 17.7                    | 9.2                        |
| 95 year and older           | 17.1                    | 17.2                       | 15.2                    | 7.2                        |
| Illness trajectory          |                         |                            |                         |                            |
| Cancer                      | 23.8                    | 33.5                       | 16.3                    | 10.0                       |
| Organ failure               | 36.2                    | 32.4                       | 19.4                    | 11.2                       |
| Prolonged dwindling         | 35.3                    | 33.1                       | 16.3                    | 7.3                        |
| Number of chronic diseases  |                         |                            |                         |                            |
| 0-1                         | 9.8                     | 11.5                       | 14.5                    | 4.5                        |
| 2-3                         | 17.2                    | 24.1                       | 15.3                    | 5.3                        |
| 4-5                         | 25.1                    | 31.2                       | 16.4                    | 7.9                        |
| ≥6                          | 37.5                    | 37.0                       | 18.9                    | 10.3                       |
| Hospital Frailty Risk Score |                         |                            |                         |                            |
| Low risk (<5)               | 27.0                    | 26.8                       | 18.0                    | 8.9                        |
| Intermediate risk (5-15)    | 34.4                    | 33.6                       | 17.8                    | 9.0                        |
| High risk (>15)             | 45.2                    | 41.9                       | 16.0                    | 8.4                        |
| Marital status              |                         |                            |                         |                            |
| Married                     | 32.7                    | 38.7                       | 17.9                    | 9.2                        |
| Single or divorced          | 31.1                    | 33.1                       | 17.2                    | 8.8                        |
| Widowed                     | 30.0                    | 31.1                       | 17.9                    | 8.7                        |
| Level of education          |                         |                            |                         |                            |
| Primary education           | 31.3                    | 31.6                       | 17.8                    | 9.0                        |
| Secondary education         | 32.0                    | 34.6                       | 17.6                    | 9.0                        |
| Tertiary education          | 30.0                    | 35.4                       | 17.5                    | 8.0                        |

**Supplementary Table 9 – Detailed list of drugs of questionable clinical benefit continued during the last 3 months of life**

| Drug class (ATC code)                           | Total                 | Illness trajectory    |                       |                       |
|-------------------------------------------------|-----------------------|-----------------------|-----------------------|-----------------------|
|                                                 |                       | Cancer                | Organ Failure         | Prolonged Dwindling   |
|                                                 | No. / No. at risk (%) |
| Statins and other lipid-lowering agents (C10A)  | 8394 / 12 875 (65.2%) | 2104 / 4023 (52.3%)   | 4707 / 6546 (71.9%)   | 1583 / 2306 (68.6%)   |
| Calcium supplements (A12A)                      | 6855 / 9856 (69.6%)   | 1517 / 2591 (58.5%)   | 3127 / 4392 (71.2%)   | 2211 / 2873 (77.0%)   |
| Antidementia drugs (N06D)                       | 4463 / 5459 (81.8%)   | 633 / 804 (78.7%)     | 617 / 751 (82.2%)     | 3213 / 3904 (82.3%)   |
| Drugs for osteoporosis (M05B)                   | 1581 / 2668 (59.3%)   | 461 / 855 (53.9%)     | 780 / 1258 (62.0%)    | 340 / 555 (61.3%)     |
| Vitamin D (A11CC)                               | 1225 / 1905 (64.3%)   | 245 / 414 (59.2%)     | 737 / 1097 (67.2%)    | 243 / 394 (61.7%)     |
| Immunostimulants (L03A)                         | 32 / 75 (42.7%)       | 30 / 71 (42.3%)       | 2 / 4 (50.0%)         | 0 / 0 (0.0%)          |
| Peripheral vasodilators (C04)                   | 0 / 0 (0.0%)          | 0 / 0 (0.0%)          | 0 / 0 (0.0%)          | 0 / 0 (0.0%)          |
| Antihypertensives excl $\alpha$ -blocker (C02)  | 42 / 62 (67.7%)       | 8 / 16 (50.0%)        | 31 / 42 (73.8%)       | 3 / 4 (75.0%)         |
| Cardiac stimulants other than glycosides (C01C) | 65 / 185 (35.1%)      | 12 / 31 (38.7%)       | 15 / 49 (30.6%)       | 38 / 105 (36.2%)      |

*Note: the number of individuals at risk corresponds to the population already treated with each specific drug class between 12 and 3 months before death.*

*Antidementia drugs include both anticholinesterases (donepezil, rivastigmine, and galantamine) and memantine.*

Supplementary Table 10 – Detailed list of drugs of questionable clinical benefit initiated during the last 3 months of life

| Drug class (ATC code)                              | Total                 | Illness trajectory    |                       |                       |
|----------------------------------------------------|-----------------------|-----------------------|-----------------------|-----------------------|
|                                                    |                       | Cancer                | Organ Failure         | Prolonged Dwindling   |
|                                                    | No. / No. at risk (%) |
| Antianemic drugs (B03A, B03B, B03XA01)             | 2090 / 35 959 (3.6%)  | 675 / 10 657 (6.3%)   | 909 / 14 307 (6.4%)   | 506 / 10 995 (4.6%)   |
| ACE Inhibitors or Angiotensin II Antagonists (C09) | 1333 / 35 858 (2.3%)  | 283 / 10 241 (2.8%)   | 794 / 12 079 (6.6%)   | 256 / 13 538 (1.9%)   |
| Statins and other lipid-lowering agents (C10A)     | 686 / 45 540 (1.2%)   | 164 / 12 315 (1.3%)   | 423 / 16 833 (2.5%)   | 99 / 16 392 (0.6%)    |
| Novel Oral Anticoagulants (B01AE, B01AF)           | 848 / 56 396 (1.5%)   | 155 / 15 862 (1.0%)   | 510 / 22 239 (2.3%)   | 183 / 18 295 (1.0%)   |
| Vitamin K Antagonists (B01AA)                      | 680 / 51 042 (1.2%)   | 128 / 14 574 (0.9%)   | 461 / 19 060 (2.4%)   | 91 / 17 408 (0.5%)    |
| Other anticoagulants (B01AD B01AX)                 | 5 / 58414 (0.0%)      | 2 / 16338 (0.0%)      | 3 / 23378 (0.0%)      | 0 / 18698 (0.0%)      |
| Antineoplastic drugs (L01)                         | 259 / 57613 (0.4%)    | 230 / 15635 (1.5%)    | 18 / 23309 (0.1%)     | 11 / 18669 (0.1%)     |
| Endocrine therapies (L02)                          | 264 / 54883 (0.5%)    | 225 / 13543 (1.7%)    | 31 / 22905 (0.1%)     | 8 / 18435 (0.0%)      |
| Immunostimulants (L03A)                            | 21 / 58340 (0.0%)     | 19 / 16267 (0.1%)     | 2 / 23375 (0.0%)      | 0 / 18698 (0.0%)      |
| Immunosuppressants (L04A)                          | 117 / 57586 (0.2%)    | 42 / 16013 (0.3%)     | 50 / 22993 (0.2%)     | 25 / 18580 (0.1%)     |
| Finasteride (G04CA51)                              | 0 / 58415 (0.0%)      | 0 / 16338 (0.0%)      | 0 / 23379 (0.0%)      | 0 / 18698 (0.0%)      |
| Vitamin D (A11CC)                                  | 432 / 56510 (0.8%)    | 100 / 15924 (0.6%)    | 223 / 22282 (1.0%)    | 109 / 18304 (0.6%)    |
| Calcium supplement (A12A)                          | 1002 / 48559 (2.1%)   | 335 / 13747 (2.4%)    | 466 / 18987 (2.5%)    | 201 / 15825 (1.3%)    |
| Cardiac glycosides excluding digoxin (C01A_excl)   | 0 / 58415 (0.0%)      | 0 / 16338 (0.0%)      | 0 / 23379 (0.0%)      | 0 / 18698 (0.0%)      |
| Other cardiac stimulants (C01C)                    | 21 / 58230 (0.0%)     | 7 / 16307 (0.0%)      | 3 / 23330 (0.0%)      | 11 / 18593 (0.1%)     |
| Antihypertensives (C02)                            | 56 / 57913 (0.1%)     | 8 / 16201 (0.0%)      | 43 / 23073 (0.2%)     | 5 / 18639 (0.0%)      |
| Peripheral vasodilators (C04)                      | 0 / 58415 (0.0%)      | 0 / 16338 (0.0%)      | 0 / 23379 (0.0%)      | 0 / 18698 (0.0%)      |
| Verapamil (C08DA01)                                | 24 / 57941 (0.0%)     | 9 / 16209 (0.1%)      | 13 / 23152 (0.1%)     | 2 / 18580 (0.0%)      |
| Urinary incontinence excluding oxybutynin (G04BD)  | 200 / 57090 (0.4%)    | 90 / 15794 (0.6%)     | 78 / 22868 (0.3%)     | 32 / 18428 (0.2%)     |
| Antidementia drugs (N06D)                          | 359 / 52956 (0.7%)    | 35 / 15534 (0.2%)     | 78 / 22628 (0.3%)     | 246 / 14794 (1.7%)    |
| Drugs for osteoporosis (M05B)                      | 286 / 55747 (0.5%)    | 114 / 15483 (0.7%)    | 132 / 22121 (0.6%)    | 40 / 18143 (0.2%)     |

Note: the number of individuals at risk amounts to the decedents who were not previously treated and had at least one refill during the last 3 months before death.  
Antianemic drugs include iron supplements, vitamin B12, folic acid, and erythropoietin.
